# Supplementary material for: Inhibition of transition metals dissolution in cobalt-free cathode with ultrathin robust interphase in concentrated electrolyte
Source: PubMed Central journal article supplement (PMC7371675; doi:10.1038/s41467-020-17396-x), 2020-07-20
Supplement: 41467_2020_17396_MOESM1_ESM.pdf [file 41467_2020_17396_MOESM1_ESM.pdf]

**Supplementary information**

**Inhibition of transition metals dissolution in cobalt-free cathode with ultrathin robust  
interphase in concentrated electrolyte**

**Liu *et al.***

**Supplementary Table 1.** Structure parameters of  $\text{Li}_{1.2}\text{Ni}_{0.15}\text{Fe}_{0.1}\text{Mn}_{0.55}\text{O}_2$ , space group:  $R\bar{3}m$

| Sample                                                                     | Lattice parameters |                    |        | $v$ ( $\text{\AA}^3$ ) | $I_{003}/I_{104}$ | Rp(%) | Rwp (%) |
|----------------------------------------------------------------------------|--------------------|--------------------|--------|------------------------|-------------------|-------|---------|
|                                                                            | a ( $\text{\AA}$ ) | c ( $\text{\AA}$ ) | c/a    |                        |                   |       |         |
| $\text{Li}_{1.2}\text{Ni}_{0.15}\text{Fe}_{0.1}\text{Mn}_{0.55}\text{O}_2$ | 2.8676             | 14.2760            | 4.9784 | 101.6654               | 1.45              | 7.61  | 8.73    |

**Supplementary Table 2. Chemical compositions acquired from ICP-OES analysis**

| Sample                                                                     | Theoretical molar content of<br>Li:Ni:Fe:Mn | Experimental molar content<br>of Li:Ni:Fe:Mn |
|----------------------------------------------------------------------------|---------------------------------------------|----------------------------------------------|
| $\text{Li}_{1.2}\text{Ni}_{0.15}\text{Fe}_{0.1}\text{Mn}_{0.55}\text{O}_2$ | 1.20:0.15:0.10:0.55                         | 1.199:0.159:0.100:0.542                      |

**Supplementary Table 3. Physicochemical Properties of electrolytes at 25°C**

| Concentration<br>(mol·dm <sup>-3</sup> ) | Density<br>(g·cm <sup>-3</sup> ) | Viscosity<br>(mPa·s) | Conductivity<br>(mS·cm <sup>-1</sup> ) |
|------------------------------------------|----------------------------------|----------------------|----------------------------------------|
| 1                                        | 1.188                            | 3.187                | 10.48                                  |
| 3                                        | 1.327                            | 19.809               | 5.30                                   |
| 4                                        | 1.432                            | 54.434               | 2.71                                   |
| 5                                        | 1.509                            | 99.471               | 1.57                                   |

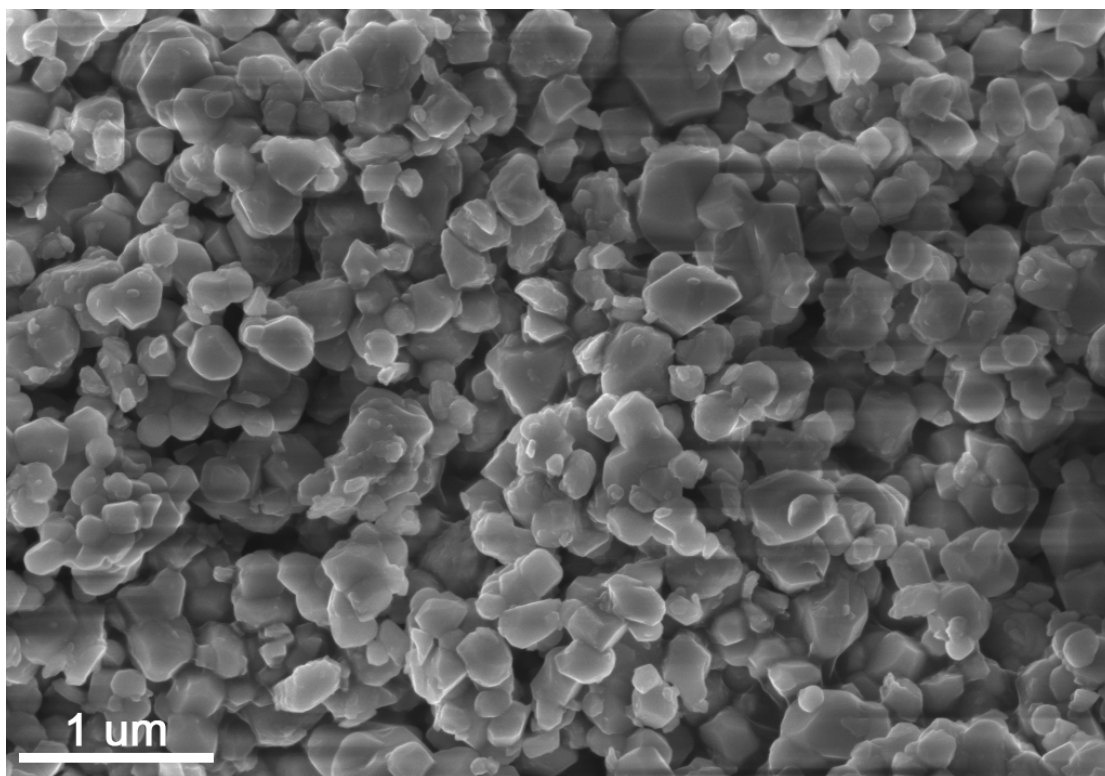

**Supplementary Fig. 1. SEM image of pristine sample.**

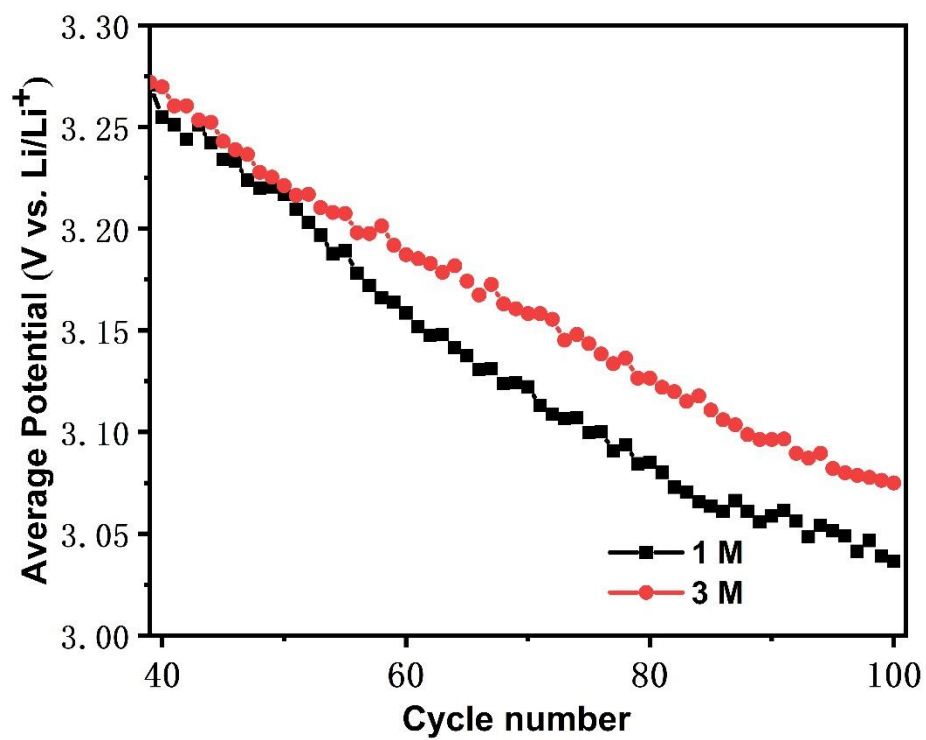

Supplementary Fig. 2. The corresponding zoom of Fig. 3b.

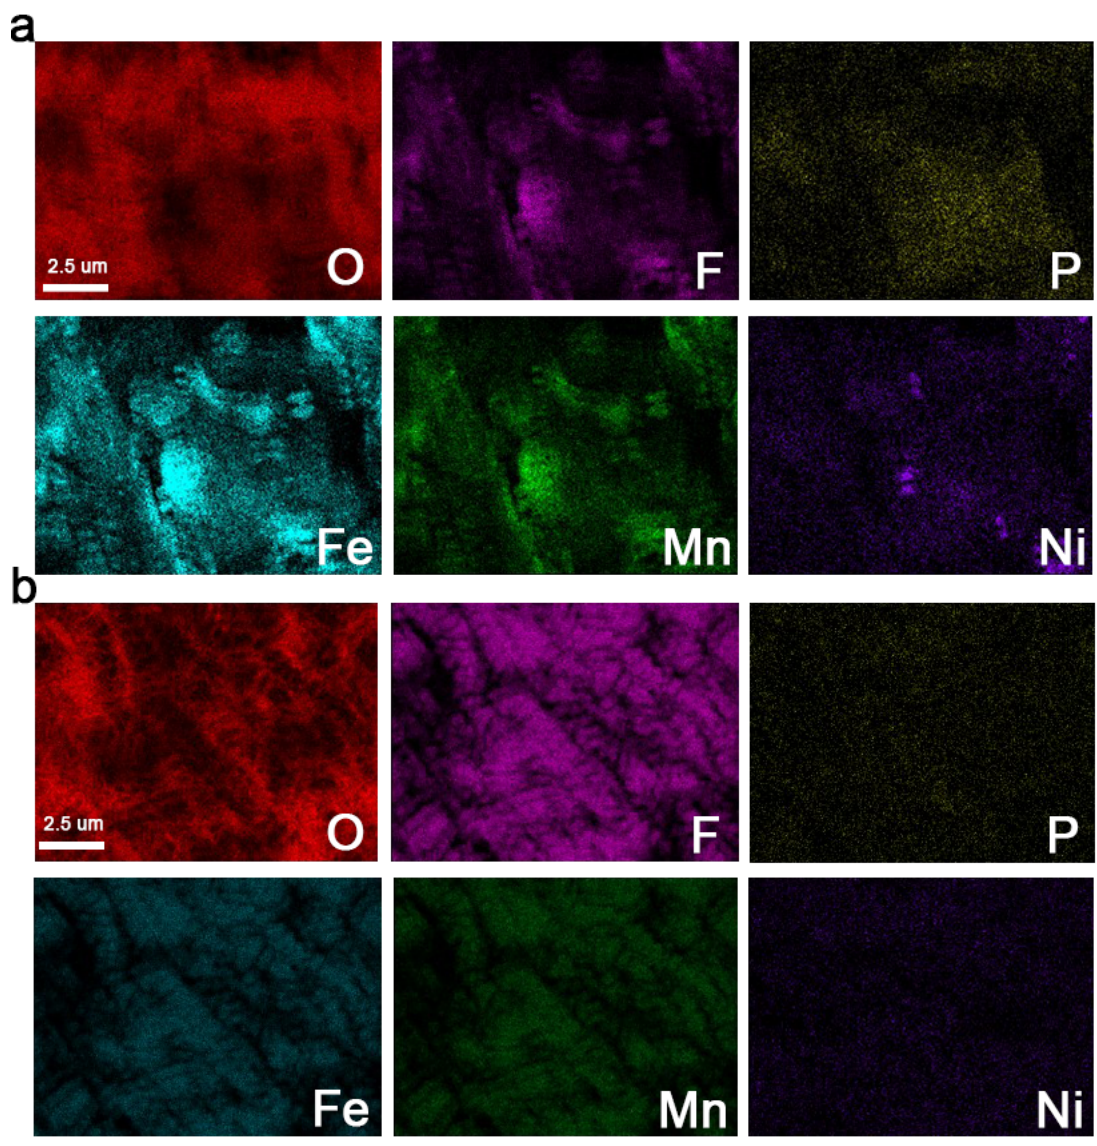

**Supplementary Fig.3. The SEM-EDS spectra of 100 cycled lithium counter electrode.** The SEM-EDS spectra of Lithium counter electrode cycled 100 cycles in 1 M electrolyte (a), and 3 M electrolyte (b), respectively.

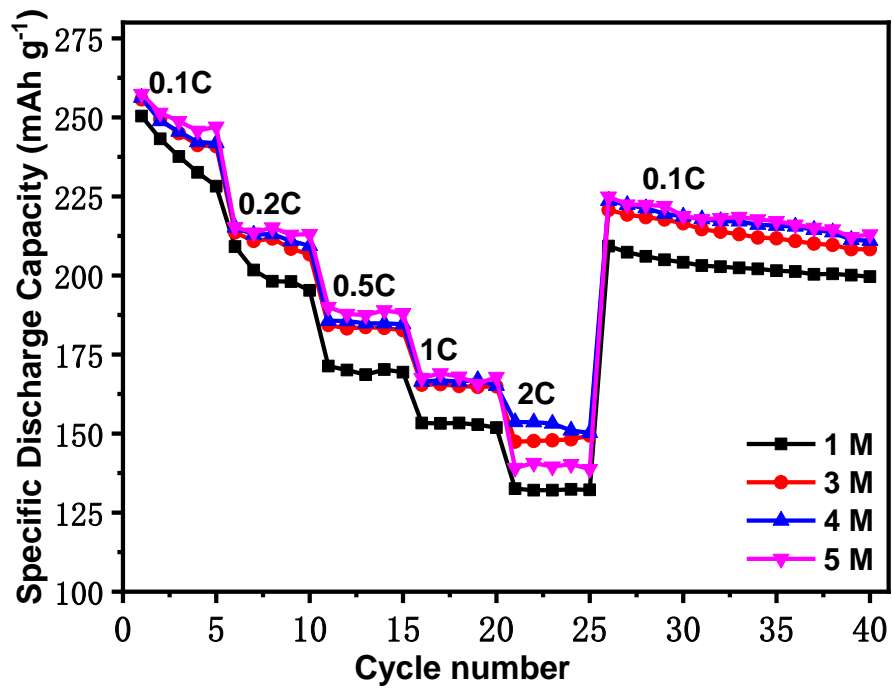

Supplementary Fig.4. Specific discharge capacity in various electrolytes at various C-rates



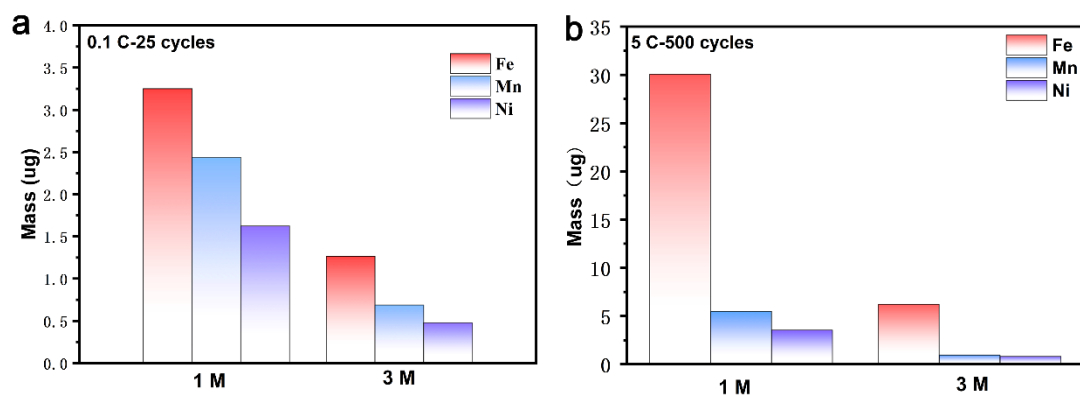

**Supplementary Fig. 5. The amount of deposited transition metals on lithium metal.** The amount of transition metals deposited on lithium metal counter electrode after 25 cycles at 0.1 C (a) and 500 cycles at 5 C (b), respectively.

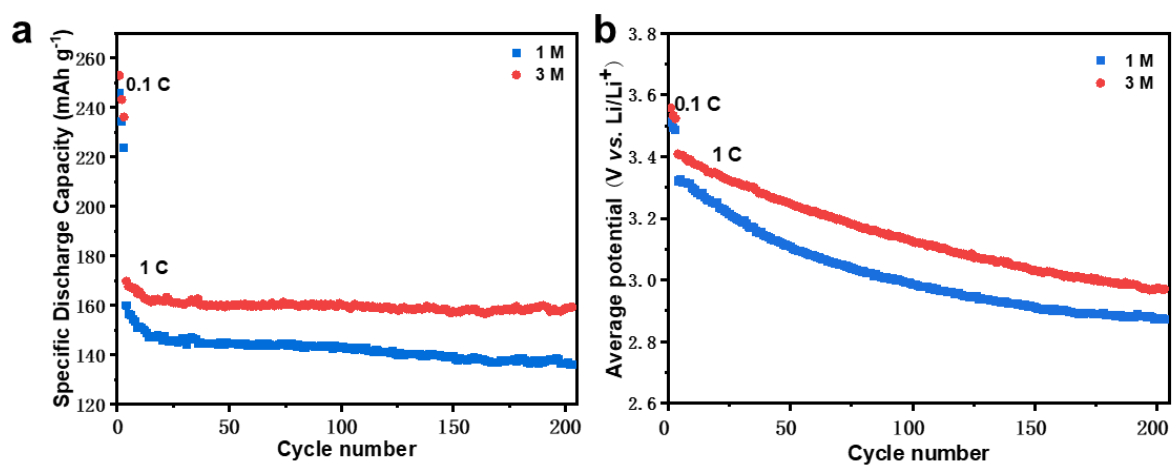

**Supplementary Fig. 6. The electrochemical performance of LNFMO at 1 C.** (a) The cycle performance at 1C in 1M and 3M electrolyte at 25 °C. (b) The corresponding average discharge potential at 1C in 1M and 3M electrolyte at 25 °C.

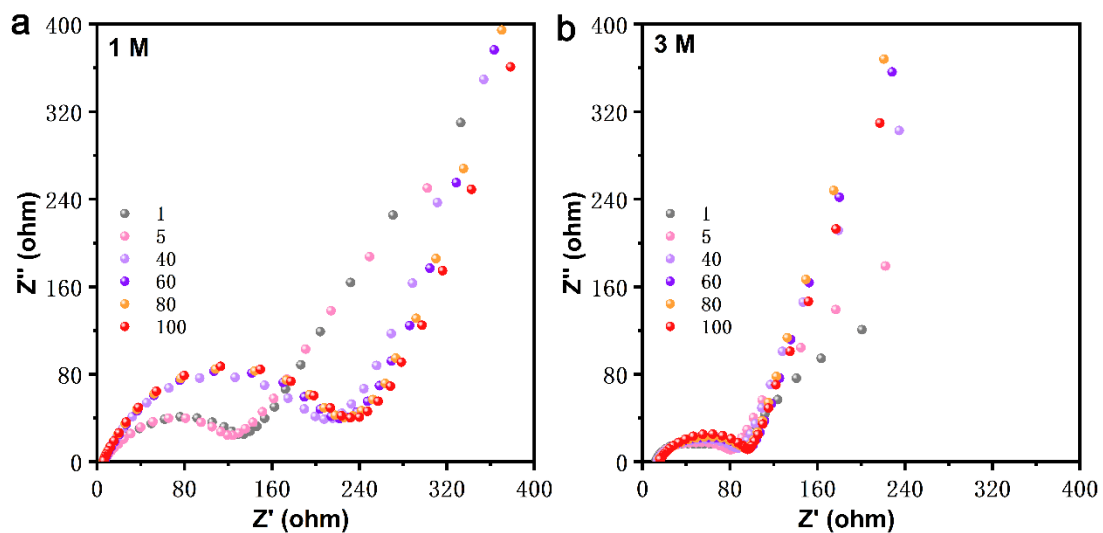

**Supplementary Fig. 7. The dependence of EIS spectra of electrode with cycle number.** The dependence of EIS spectra of LNFMO electrode discharged to the 50% state of charge at 1 M electrolyte (a) and 3 M electrolyte (b) with cycle number.

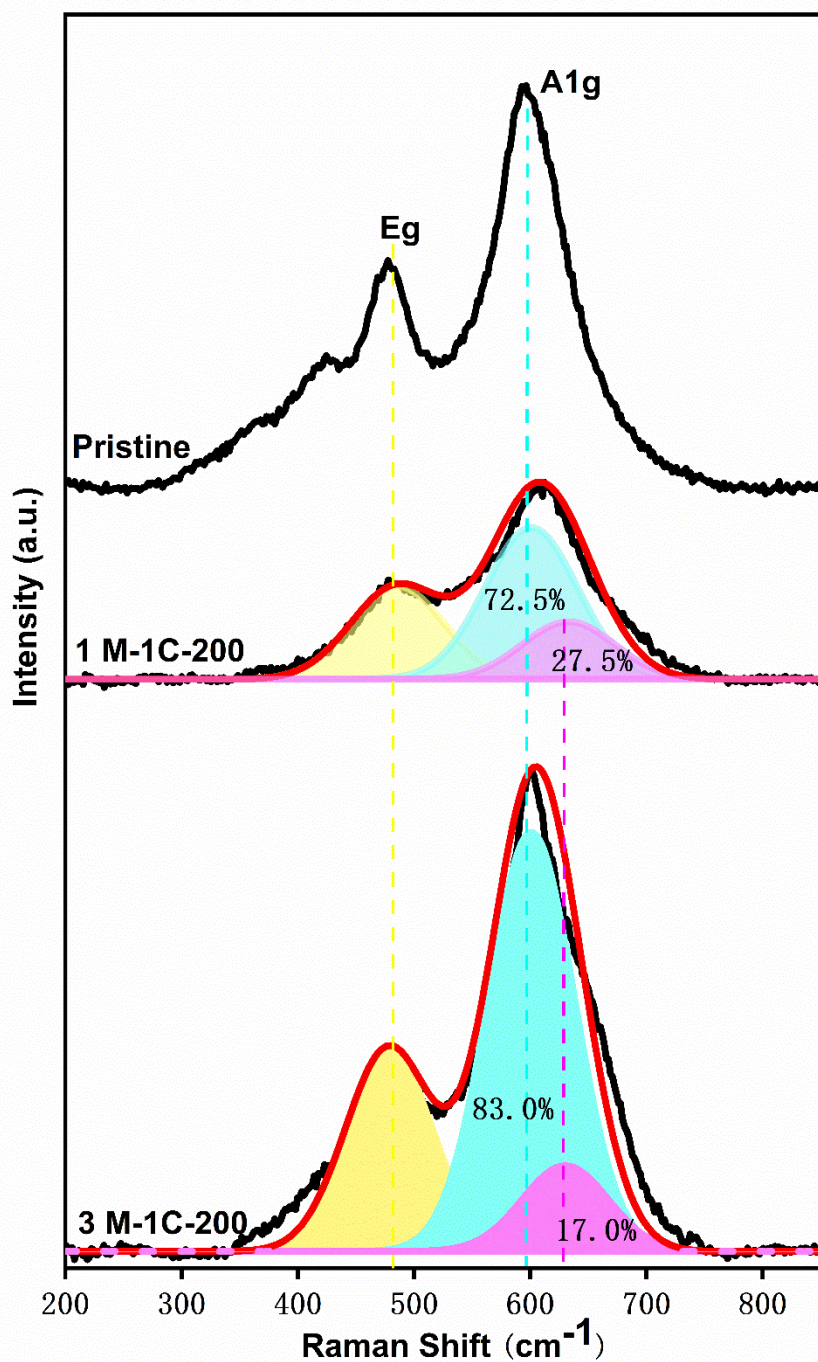

Supplementary Fig. 8. The Raman spectra of pristine LLNFMO and the electrodes after 200 cycles at 1C in 1 M and 3 M electrolyte.

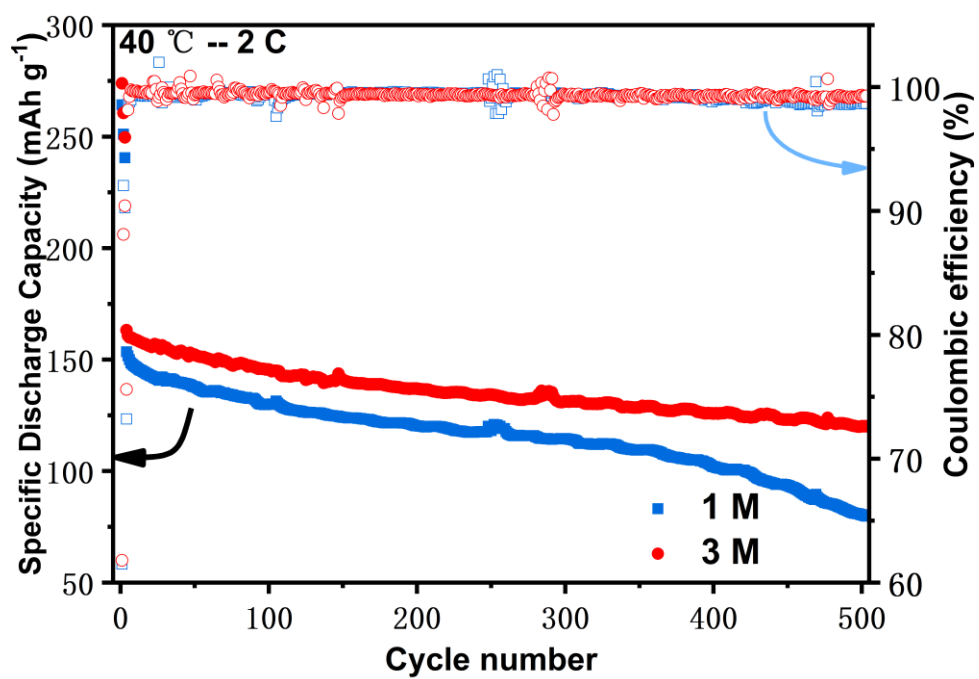

Supplementary Fig.9. The 2 C rate cycle performance in 1 M and 3 M electrolytes at elevated temperature (40 °C).

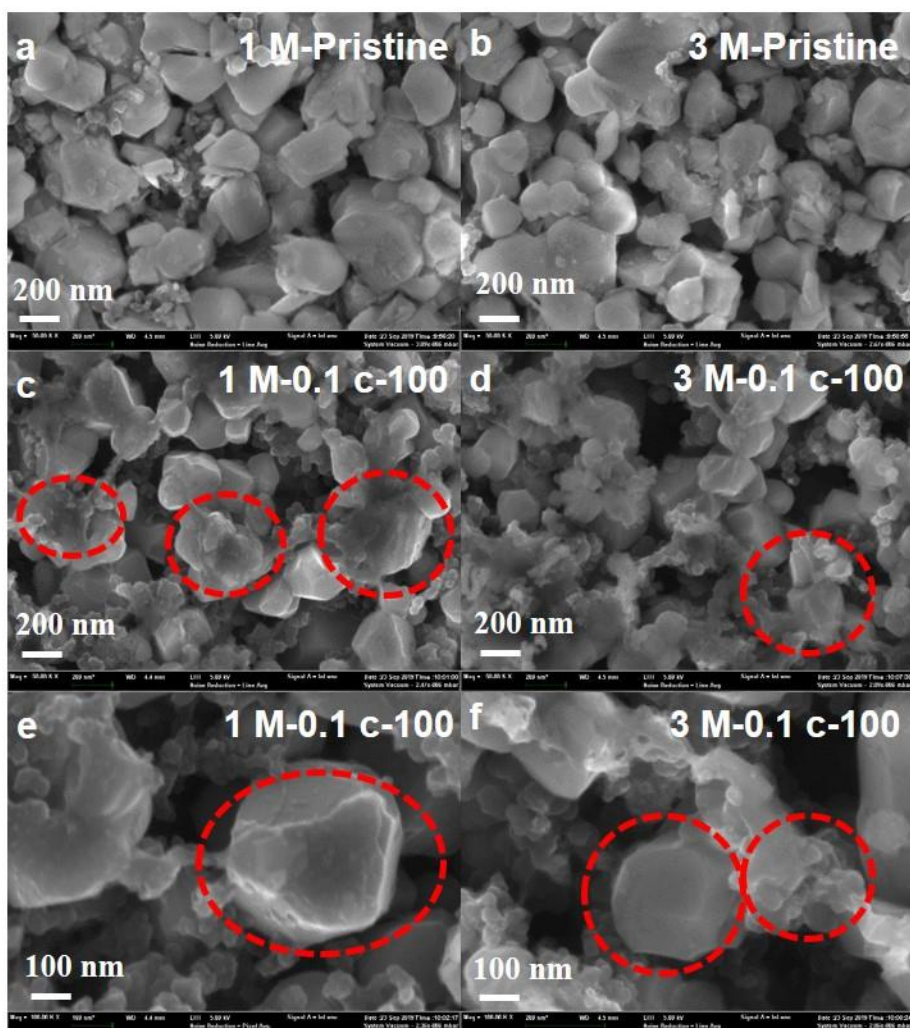

**Supplementary Fig.10. The SEM images of electrode.** The SEM images of the pristine electrode. The SEM images of the at 0.1C in 1 M (a) and 3 M electrolytes (b); the SEM images of the 100 cycled electrode at 0.1 C in 1 M (c,e) and 3 M (d,f) electrolyte.

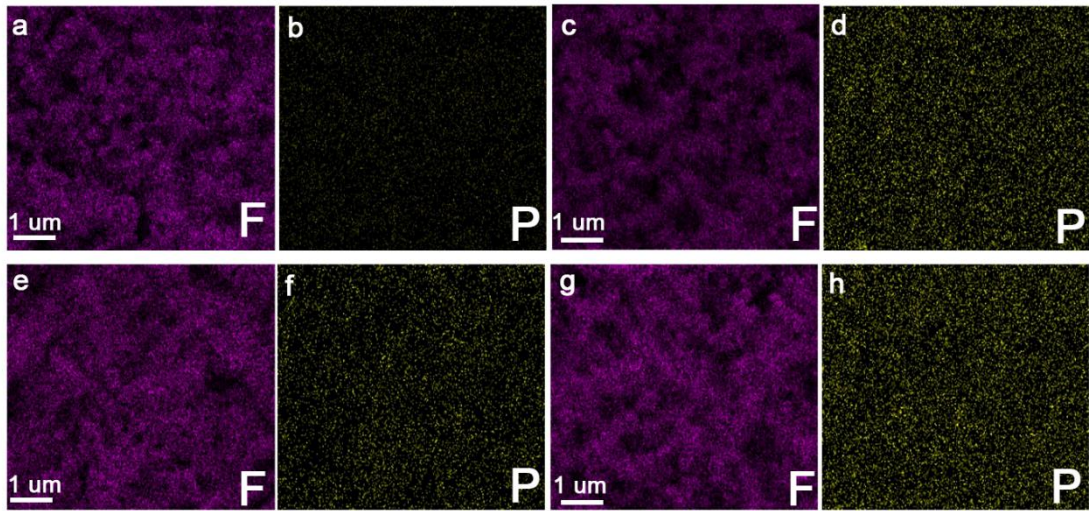

**Supplementary Fig.11. EDS mapping of F、 P for the pristine and 100 cycled at 0.1C .(a, b) The pristine of LLNFMO Shelved for 24 hours in 1 Melectrolyte; (c, d) LLNFMO after 100 cycles in 1 M electrolyte at 0.1C; (e, f) the pristine of LLNFMO shelved for 24 hours in 3 M electrolyte; (g, h) LLNFMO after 100 cycles in 3 M electrolyte at 0.1C .**

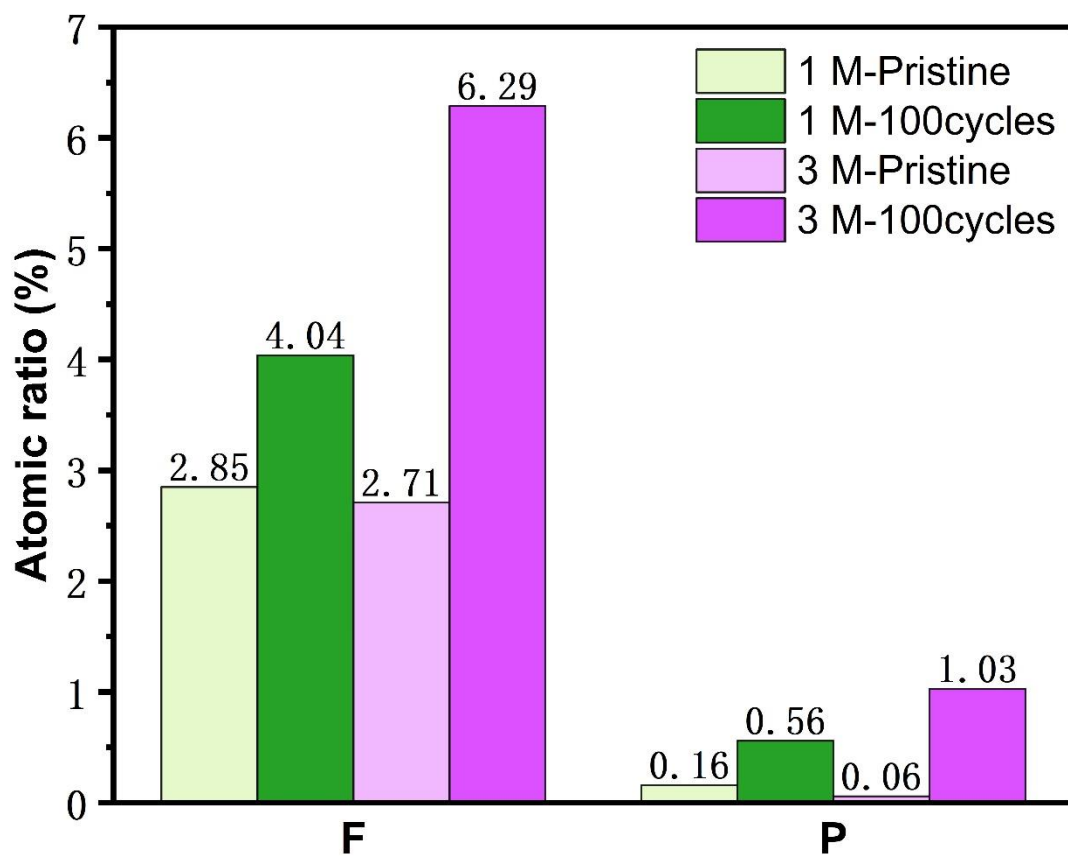

**Supplementary Fig. 12. The atomic ratio of F and P on electrode surface.** The atomic ratio of F and P on the surface of pristine (shelved for 24 hours in coin cell) and 100 cycled at 0.1C in 1 M and 3 M electrolytes.



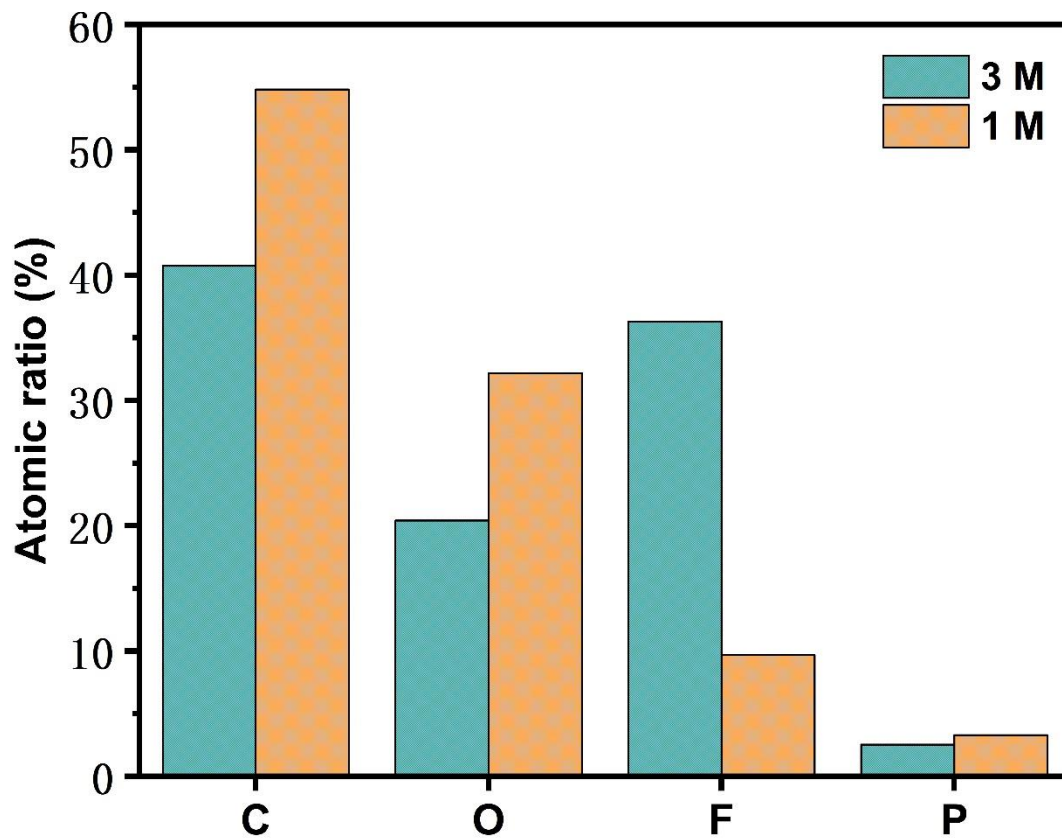

**Supplementary Fig. 13. The element atomic ratio of cycled electrode.** The atomic ratio of C, O, F, and P on the surface of electrode cycled in 1 M and 3 M electrolyte at 0.1C for 100 cycles obtained by XPS spectra.

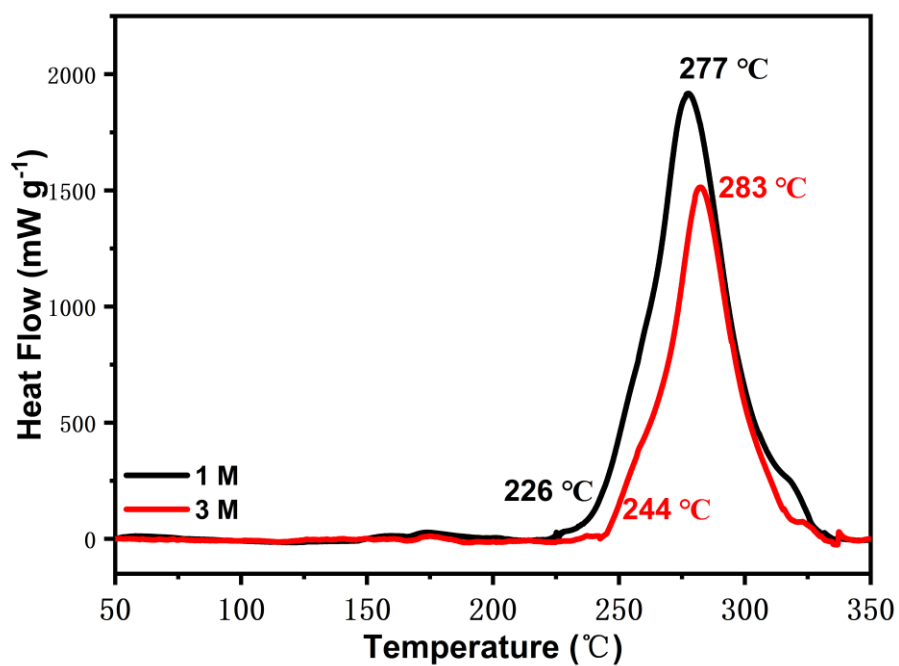

**Supplementary Fig. 14. DSC profile of electrode.** The DSC profile of LNFMO electrode after the first charging to 4.8V in 1 M and 3 M electrolyte.

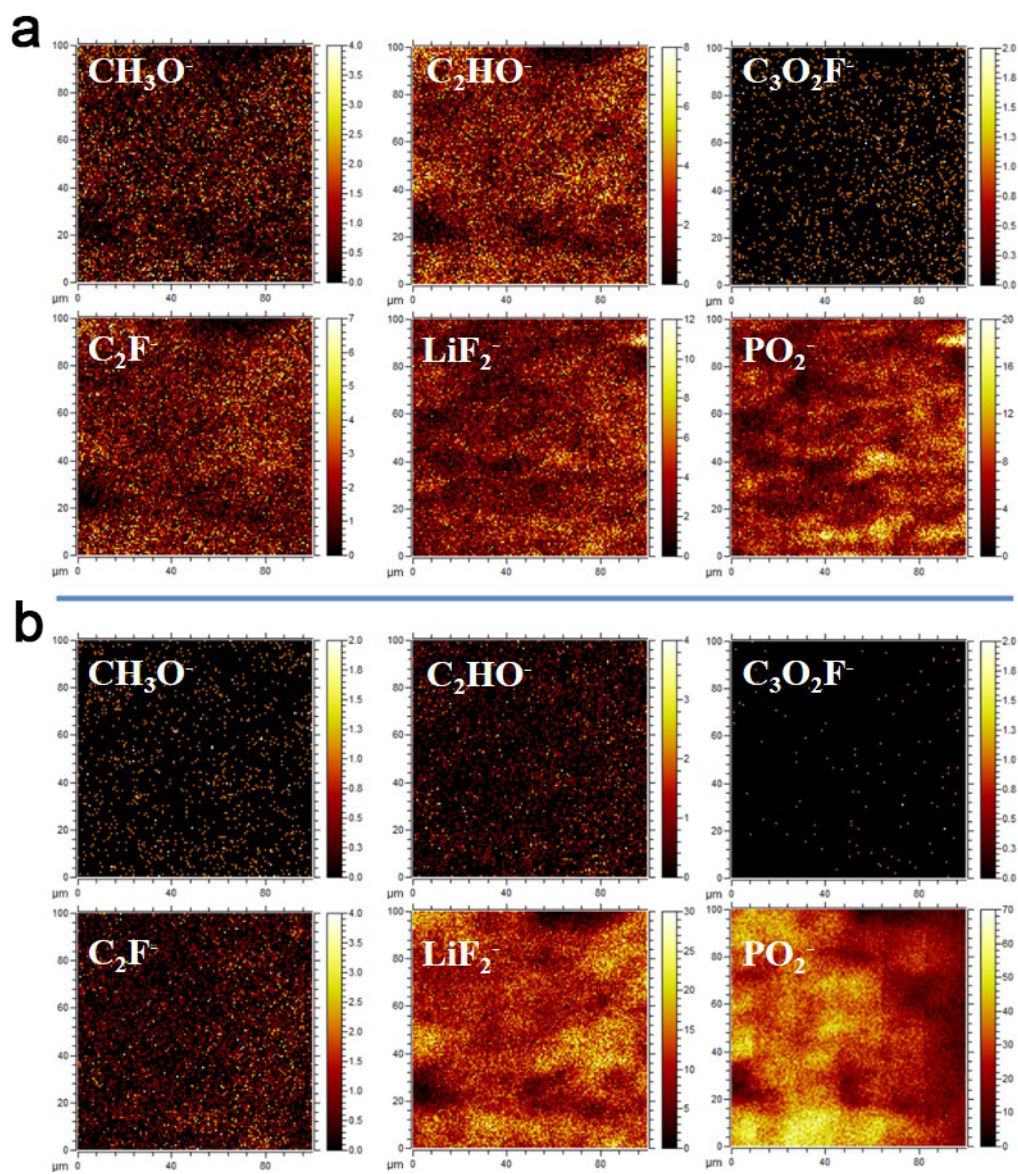

**Supplementary Fig. 15. TOF-SIMS chemical maps of several typical second ion fragments.** TOF-SIMS chemical maps of several typical second ion fragments with 25s of sputtering on electrodes cycled in 1 M electrolyte (a) and 3 M electrolyte (b), respectively.

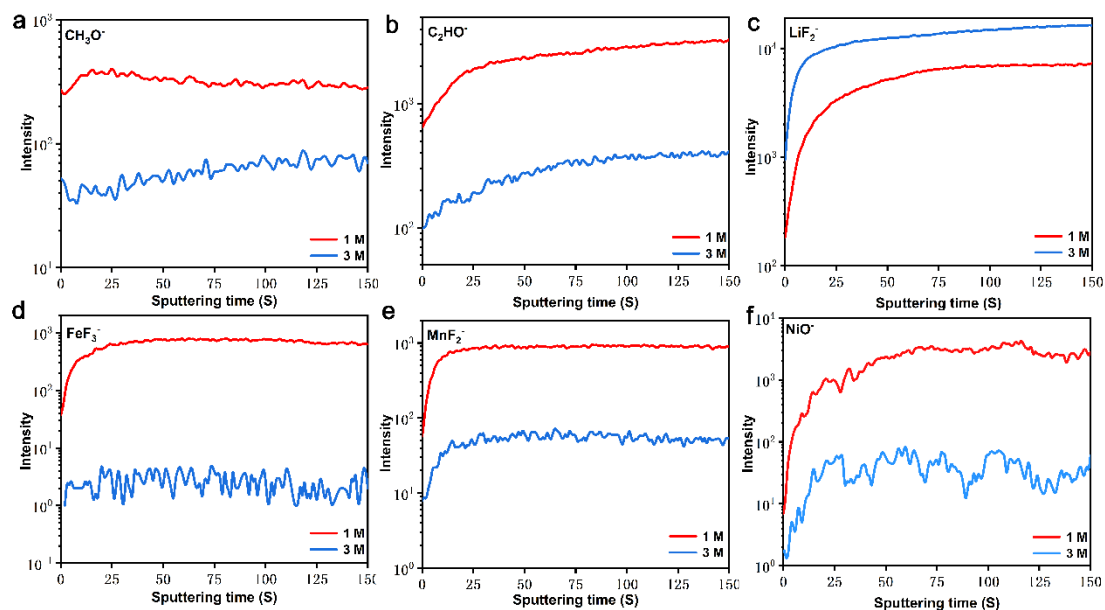

**Supplementary Fig. 16. Corresponding depth profiling of second ion fragments on electrodes.** The corresponding depth profiling of  $\text{CH}_3\text{O}^-$  (a),  $\text{C}_2\text{HO}^-$  (b),  $\text{LiF}_2^-$  (c),  $\text{FeF}_3^-$  (d),  $\text{MnF}_2^-$  (e), and  $\text{NiO}^-$  (f) second ion fragments with 150s of sputtering on electrodes cycled in 1 M and 3 M electrolyte, respectively.

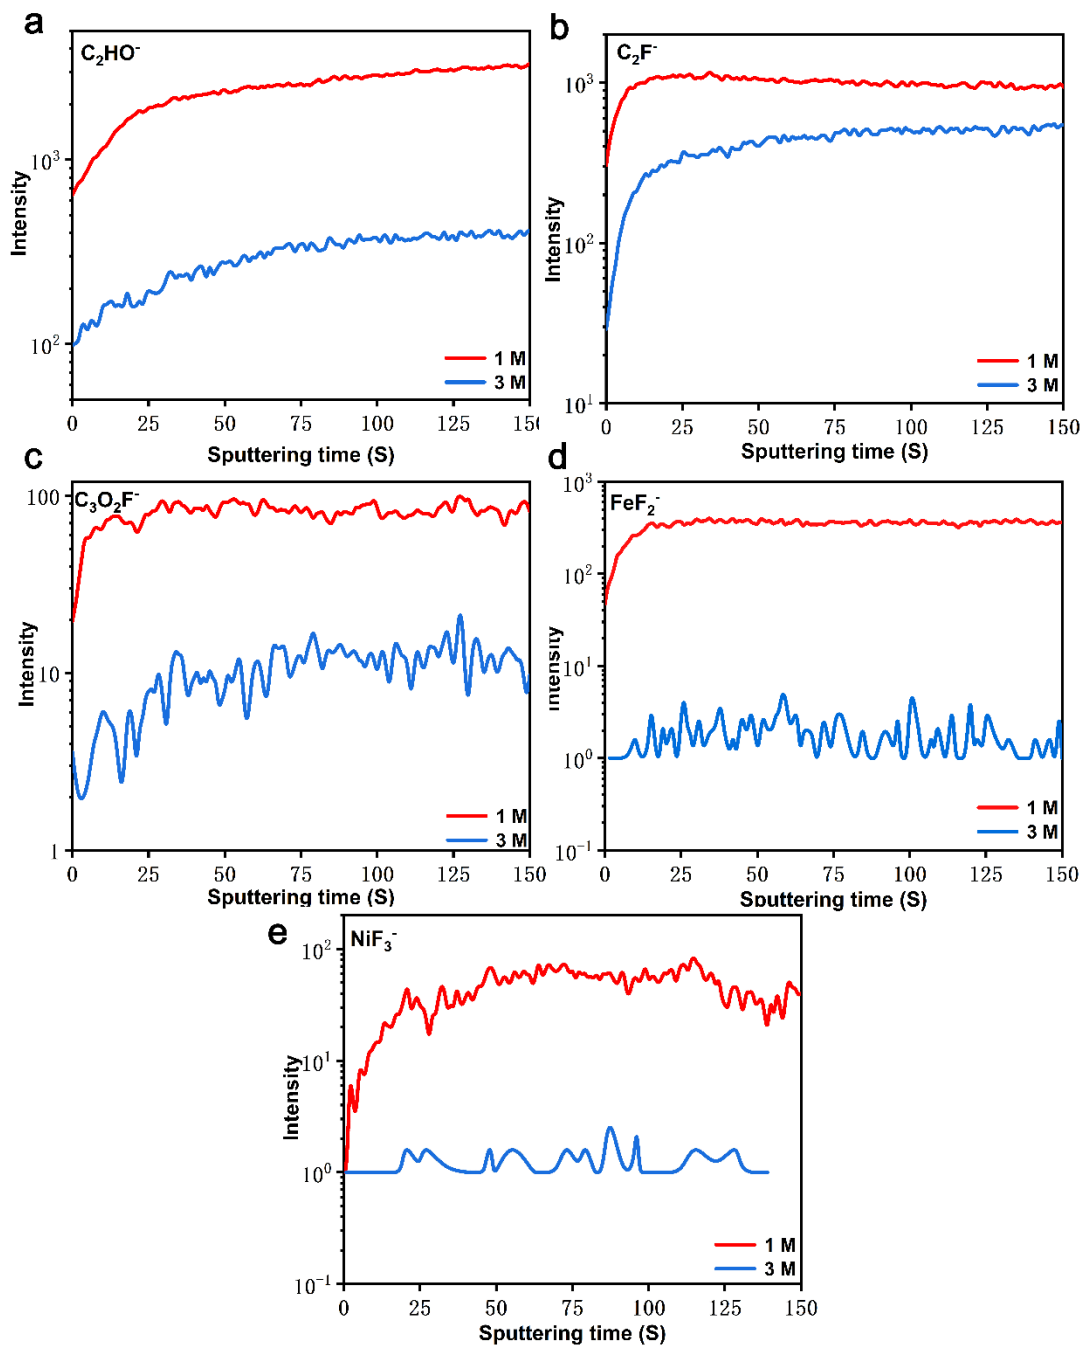

**Supplementary Fig. 17. Depth profiling of second ion fragments of interest on electrodes.** The depth profiling of  $C_2HO^-$  (a) ,  $C_2F^-$  (b),  $C_3O_2F^-$  (c),  $FeF_2^-$  (d), and  $NiF_3^-$  (e) second ion fragments with 150s of sputtering on electrodes cycled in 1 M and 3 M electrolyte, respectively.
